# Supplementary material for: The Biological Activity of Monarda didyma L. Essential Oil and Its Effect as a Diet Supplement in Mice and Broiler Chicken
Source: MDPI journal article supplement (doi:10.3390/molecules26113368), 2021-06-02
Supplement: s1 [file s1]

## Supplementary materials

# The biological activity of *Monarda didyma* L. essential oil and its effect as a diet supplement in mice and broiler chicken

Héloïse Côté <sup>1,3</sup>, André Pichette <sup>1,3</sup>, Alexis St-Gelais <sup>2</sup> and Jean Legault <sup>1,3,\*</sup>

<sup>1</sup> Laboratoire d'Analyse et de Séparation des Essences Végétales, Université du Québec à Chicoutimi, 555 boulevard de l'Université, Chicoutimi, QC, G7H 2B1, Canada; heloise.cote@uqac.ca (H.C.); Andre\_Pichette@uqac.ca (A.P.); Jean\_Legault@uqac.ca (J.L.)

<sup>2</sup> Laboratoire PhytoChemia Inc., 628, Boul. du Saguenay Ouest, Saguenay, QC G7J 1H4, Canada; a.st-gelais@phytochemia.com (A.S.-G.)

<sup>3</sup> Centre de recherche sur la boréale (CREB), Département des Sciences Fondamentales, Université du Québec à Chicoutimi, 555 boulevard de l'Université, Chicoutimi, QC, Canada, G7H 2B1. ; heloise.cote@uqac.ca (H.C.); Andre\_Pichette@uqac.ca (A.P.); Jean\_Legault@uqac.ca (J.L.).

\* Correspondence: Jean\_Legault@uqac.ca

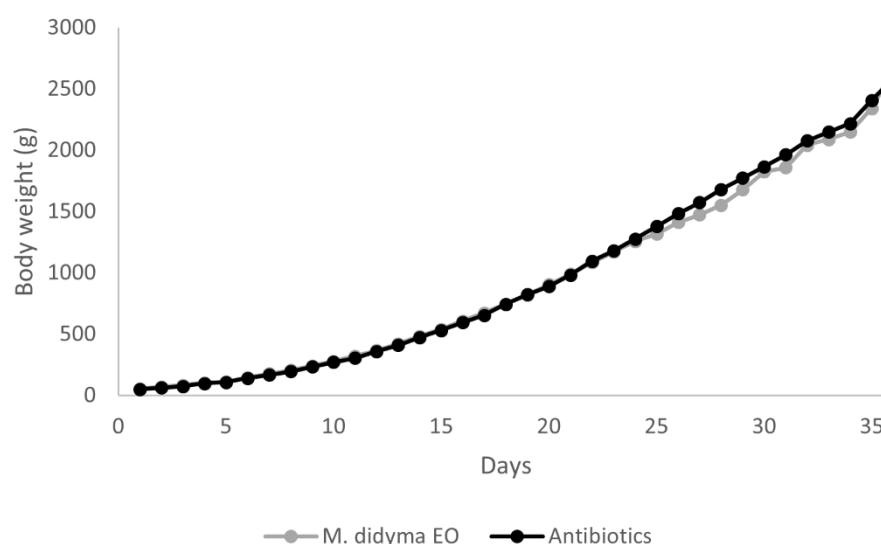

**Figure S1.** Body weight gain for *M. didyma* essential oil and antibiotics groups for day 0-36. Data represent de mean of the two groups.

**Table S1.** Composition of *Thymus vulgaris* L. essential oil

| RI   | Identified compounds                    |                             | Relative concentration (%) |
|------|-----------------------------------------|-----------------------------|----------------------------|
|      | Name                                    | Identification <sup>1</sup> |                            |
| 775  | Methyl 2-methylbutyrate                 | MS, RI                      | 0.31                       |
| 927  | $\alpha$ -Thujene                       | MS, RI                      | 0.61                       |
| 932  | $\alpha$ -Pinene                        | MS, RI                      | 1.58                       |
| 944  | Camphene + $\alpha$ -Fenchene           | MS, RI                      | 1.83                       |
| 972  | $\beta$ -Pinene + Sabinene              | MS, RI                      | 0.31                       |
| 983  | Octen-3-ol                              | MS, RI                      | 1.36                       |
| 988  | Octan-3-one                             | MS, RI                      | 0.12                       |
| 994  | Myrcene                                 | MS, RI                      | 1.22                       |
| 999  | Octan-3-ol                              | MS, RI                      | 0.26                       |
| 1003 | $\alpha$ -Phellandrene + Pseudolimonene | MS, RI                      | 0.14                       |

|      |                                                                               |        |       |
|------|-------------------------------------------------------------------------------|--------|-------|
| 1016 | $\alpha$ -Terpinene                                                           | MS, RI | 1.12  |
| 1027 | <i>para</i> -Cymene                                                           | MS, RI | 43.12 |
| 1028 | Limonene + $\beta$ -Phellandrene + 1,8-Cineole                                | MS, RI | 1.22  |
| 1059 | $\gamma$ -Terpinene                                                           | MS, RI | 8.16  |
| 1065 | <i>cis</i> -Sabinene hydrate                                                  | MS, RI | 0.57  |
| 1087 | Terpinolene + <i>para</i> -Cymenene + <i>trans</i> -Linalool oxide (furanoid) | MS, RI | 0.30  |
| 1096 | <i>trans</i> -Sabinene hydrate + 6,7-Epoxymyrcene                             | MS, RI | 0.31  |
| 1103 | Linalool                                                                      | MS, RI | 4.17  |
| 1118 | <i>cis-para</i> -Menth-2-en-1-ol                                              | MS, RI | 0.13  |
| 1137 | Camphor + <i>trans-para</i> -Menth-2-en-1-ol                                  | MS, RI | 1.37  |
| 1162 | Borneol                                                                       | MS, RI | 2.79  |
| 1174 | Terpinen-4-ol                                                                 | MS, RI | 1.28  |
| 1182 | <i>para</i> -Cymen-8-ol                                                       | MS, RI | 0.16  |
| 1187 | $\alpha$ -Terpineol                                                           | MS, RI | 0.26  |
| 1192 | <i>cis</i> -Piperitol                                                         | MS, RI | 0.11  |
| 1235 | Thymol methyl ether + Cuminal                                                 | MS, RI | 0.22  |
| 1243 | Carvacrol methyl ether                                                        | MS, RI | 0.61  |
| 1259 | Geraniol                                                                      | MS, RI | 0.10  |
| 1286 | Bornyl acetate                                                                | MS, RI | 0.53  |
| 1290 | Isothymol                                                                     | MS, RI | 0.33  |
| 1299 | Thymol                                                                        | MS, RI | 15.38 |
| 1300 | Thymol isomer                                                                 | MS, RI | 0.15  |
| 1305 | Carvacrol                                                                     | MS, RI | 1.44  |
| 1374 | Bornyl propionate                                                             | MS, RI | 0.10  |
| 1380 | $\beta$ -Bourbonene                                                           | MS, RI | 0.10  |
| 1414 | $\beta$ -Caryophyllene                                                        | MS, RI | 2.32  |
| 1440 | Unknown [m/z 151, 166 (42), 133 (18), 105 (17), 152 (10)]                     | MS, RI | 0.16  |
| 1473 | $\gamma$ -Murolene                                                            | MS, RI | 0.12  |
| 1477 | Geranyl propionate                                                            | MS, RI | 0.12  |
| 1509 | $\gamma$ -Cadinene                                                            | MS, RI | 0.37  |
| 1516 | <i>trans</i> -Calamenene                                                      | MS, RI | 0.13  |
| 1520 | $\delta$ -Cadinene                                                            | MS, RI | 0.16  |
| 1574 | Caryophyllene oxide                                                           | MS, RI | 1.10  |
|      | Total                                                                         |        | 96.25 |

<sup>1</sup>MS: Identification by GC-MS; RI: Compounds were identified by comparison of GC retention indices relative to retention times of a series of n-alkanes(C7-C36) and compared with literature data. Compounds  $\leq 0.1$  % are not reported.

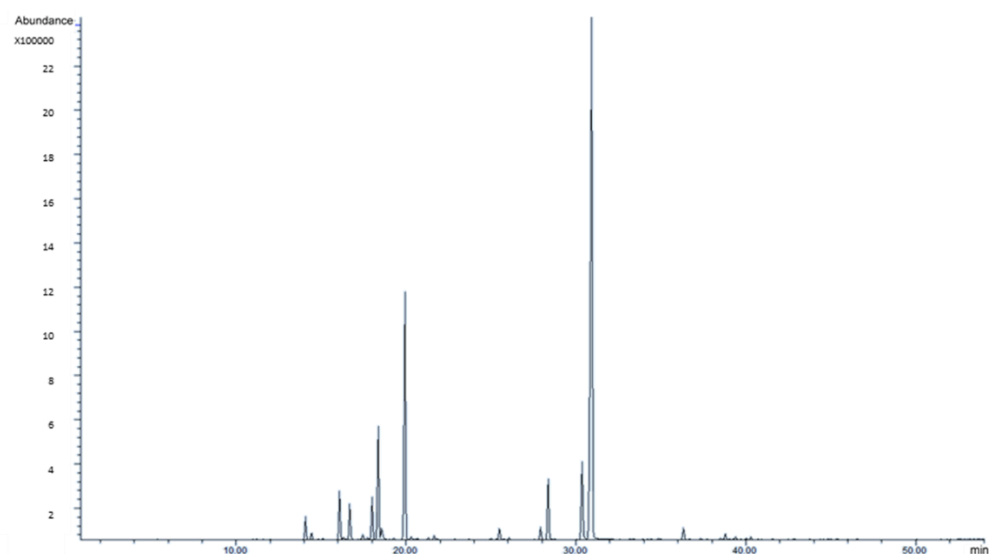

Figure S2. Chromatograms with GC-FID obtain for *M. didyma* essential oil
